# Supplementary material for: Prevalence of Serious Emotional Disturbance Among U.S. Children: A Meta-Analysis
Source: Atypon-hosted journal article supplement (doi:10.1176/appi.ps.201700145), 2017-09-01

Supplemental Figure 1. PRISMA Flow Diagram of Study Identification, Screening, and Selection

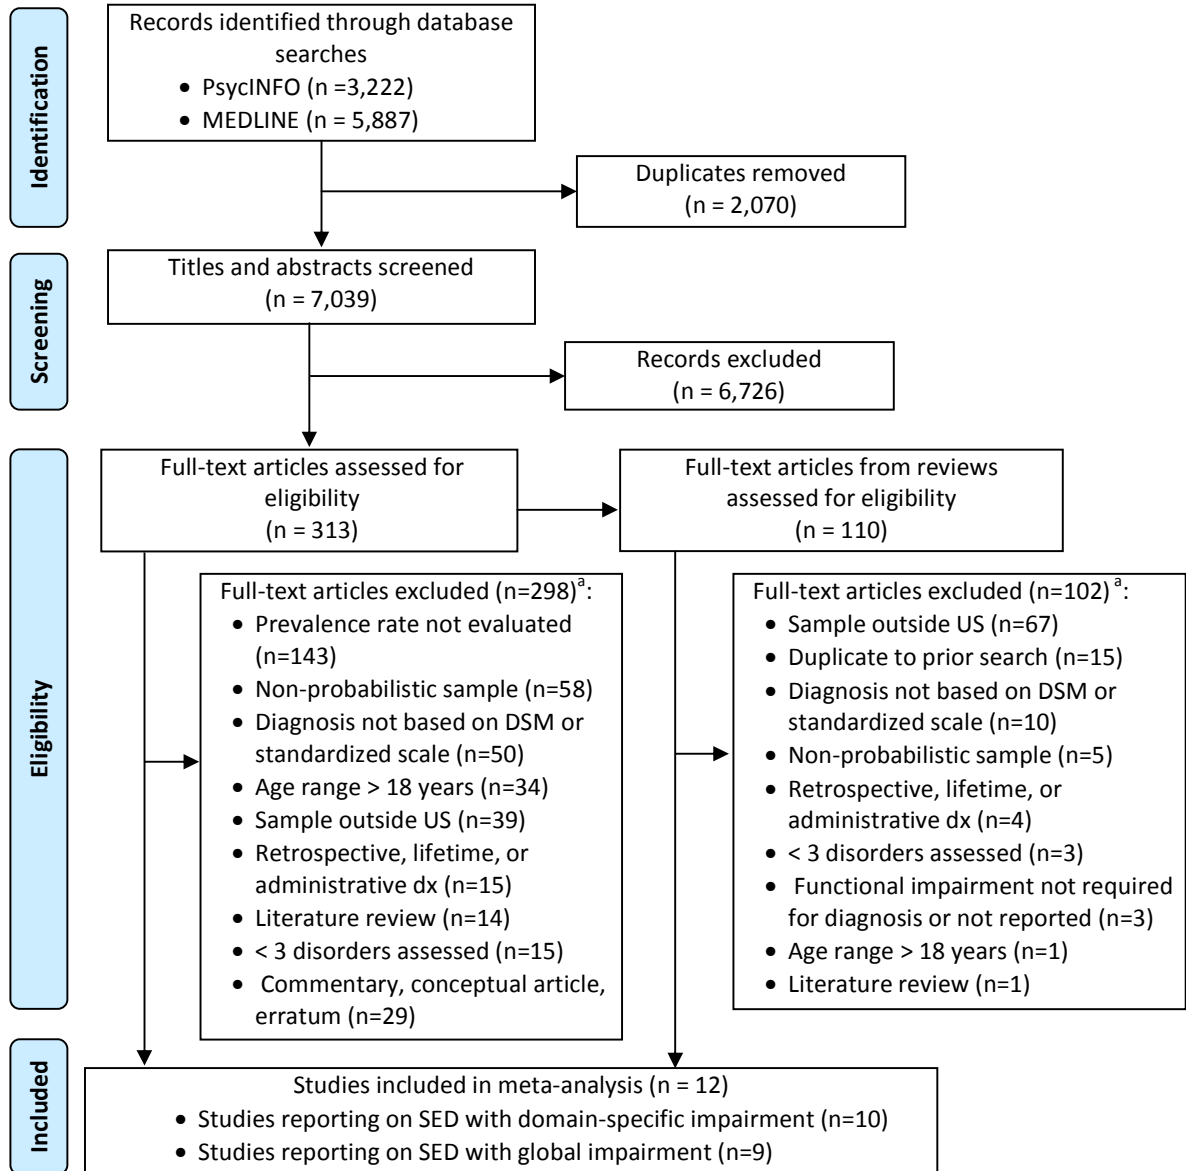

<sup>a</sup> Category *n*'s do not sum to total *N* because articles could be excluded for multiple reasons.



Supplemental Table 1. Meta-Analyses of Serious Emotional Disturbance (SED) Prevalence by Study Type and Level of Impairment

| Study Type                 | Domain-Specific SED |               |          |          | Global SED     |               |          |          |
|----------------------------|---------------------|---------------|----------|----------|----------------|---------------|----------|----------|
|                            | Prevalence (%)      | 95% <i>CI</i> | <i>k</i> | <i>N</i> | Prevalence (%) | 95% <i>CI</i> | <i>k</i> | <i>N</i> |
| US National Sample         | 10.75               | 10.22 – 11.29 | 2        | 21,907   | 6.75           | 5.91 – 7.58   | 3        | 35,226   |
| Regional Sample            | 9.84                | 7.98 – 11.70  | 8        | 10,108   | 5.76           | 4.98 – 6.55   | 5        | 3,713    |
| Taxonomic DSM Diagnoses    | 10.00               | 8.33 – 11.65  | 9        | 13,150   | 5.96           | 5.21 – 6.71   | 6        | 10,196   |
| Quantitative Rating Scale  | 10.70               | 10.14 – 11.26 | 1        | 18,865   | 6.62           | 5.74 – 7.51   | 2        | 28,743   |
| 12-month Timeframe         | 11.26               | 10.38 – 12.15 | 3        | 7,480    | 6.99           | 4.84 – 9.14   | 2        | 6,746    |
| < 12-month Timeframe       | 9.46                | 7.60 – 11.31  | 7        | 24,535   | 6.29           | 5.67 – 6.91   | 6        | 32,193   |
| Data Collected before 1992 | 10.09               | 7.66 – 12.52  | 6        | 4,918    | 5.55           | 4.68 – 6.41   | 4        | 2,698    |
| Data Collected after 1992  | 10.26               | 8.68 – 11.74  | 4        | 27,097   | 6.73           | 6.03 – 7.43   | 4        | 36,241   |
| Total                      | 10.06               | 8.60 – 11.51  | 10       | 32,015   | 6.36           | 5.78 – 6.93   | 8        | 38,939   |

*Note:* *k* = number of studies included in the meta-analysis, *N* = number of youth included in the meta-analysis.



Supplemental Figure 2. Meta-Analytic Prevalence Estimates of Serious Emotional Disturbance (SED) by Study Type and Level of Impairment.

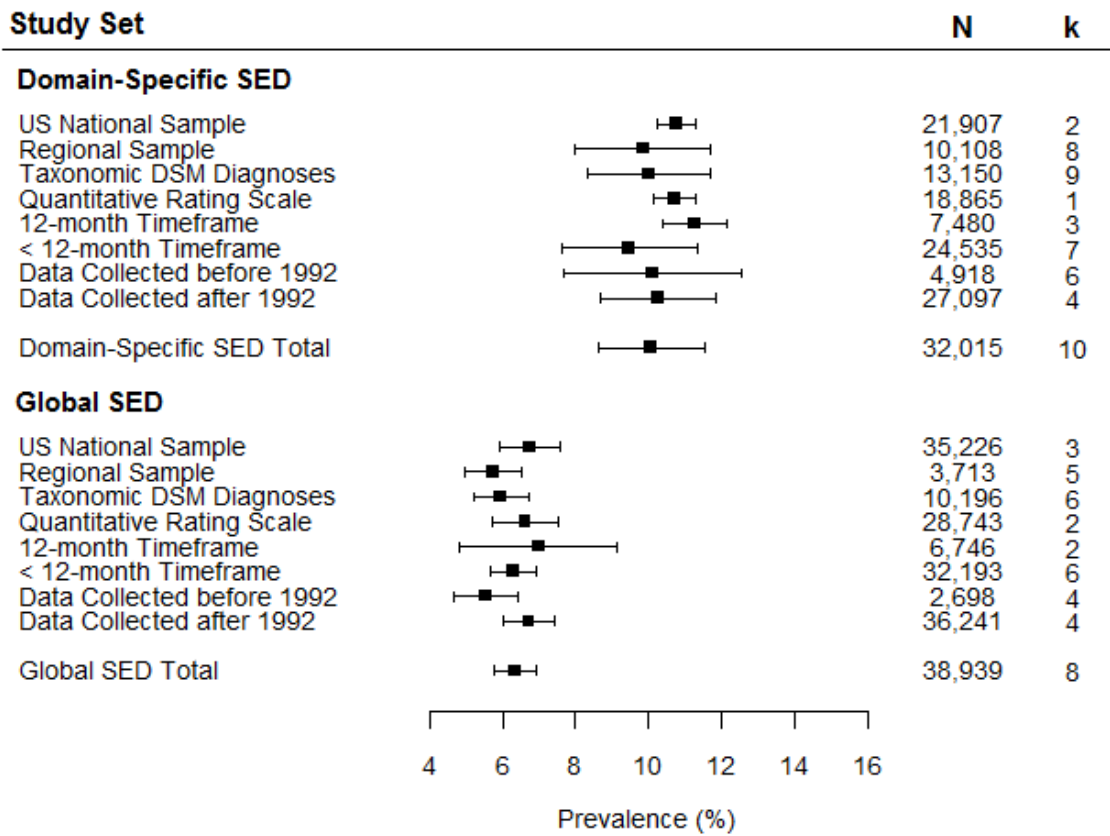

Note: *N* = number of youth included in meta-analytic estimate; *k* = number of studies included in meta-analytic estimate.

Supplemental Figure 3. Domain-Specific SED Prevalence Estimates Ordered by Year of Data Collection.

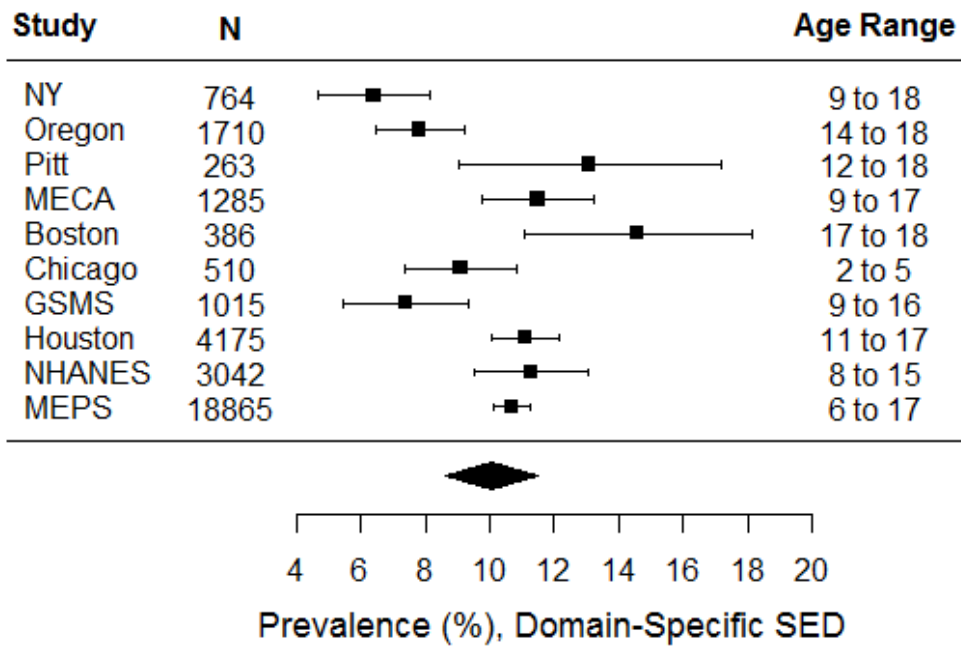

Supplemental Figure 4. Global SED Prevalence Estimates Ordered by Year of Data Collection.

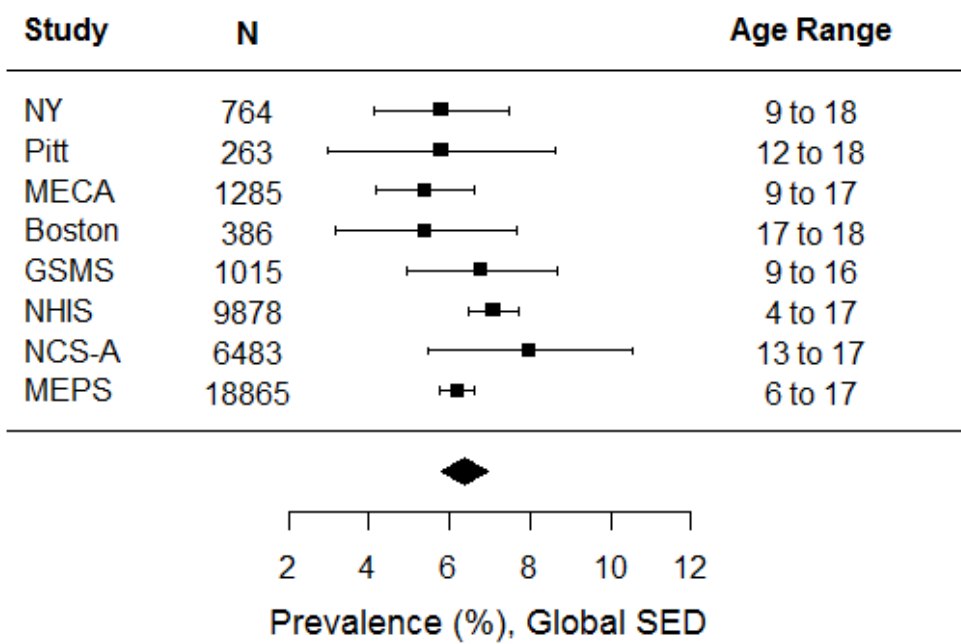

Supplement: appi.ps.201700145.ds001.pdf [file appi.ps.201700145.ds001.pdf]
